# Supplementary material for: Syngeneic animal models of tobacco-associated oral cancer reveal the activity of in situ anti-CTLA-4
Source: PubMed Central journal article supplement (PMC6895221; doi:10.1038/s41467-019-13471-0), 2019-12-05
Supplement: 41467_2019_13471_MOESM1_ESM.pdf [file 41467_2019_13471_MOESM1_ESM.pdf]

Supplementary information for:

**Syngeneic animal models of tobacco-associated oral cancer reveals the activity of *in situ* anti-CTLA-4**

Wang *et al.*,

# Supplementary Figure 1

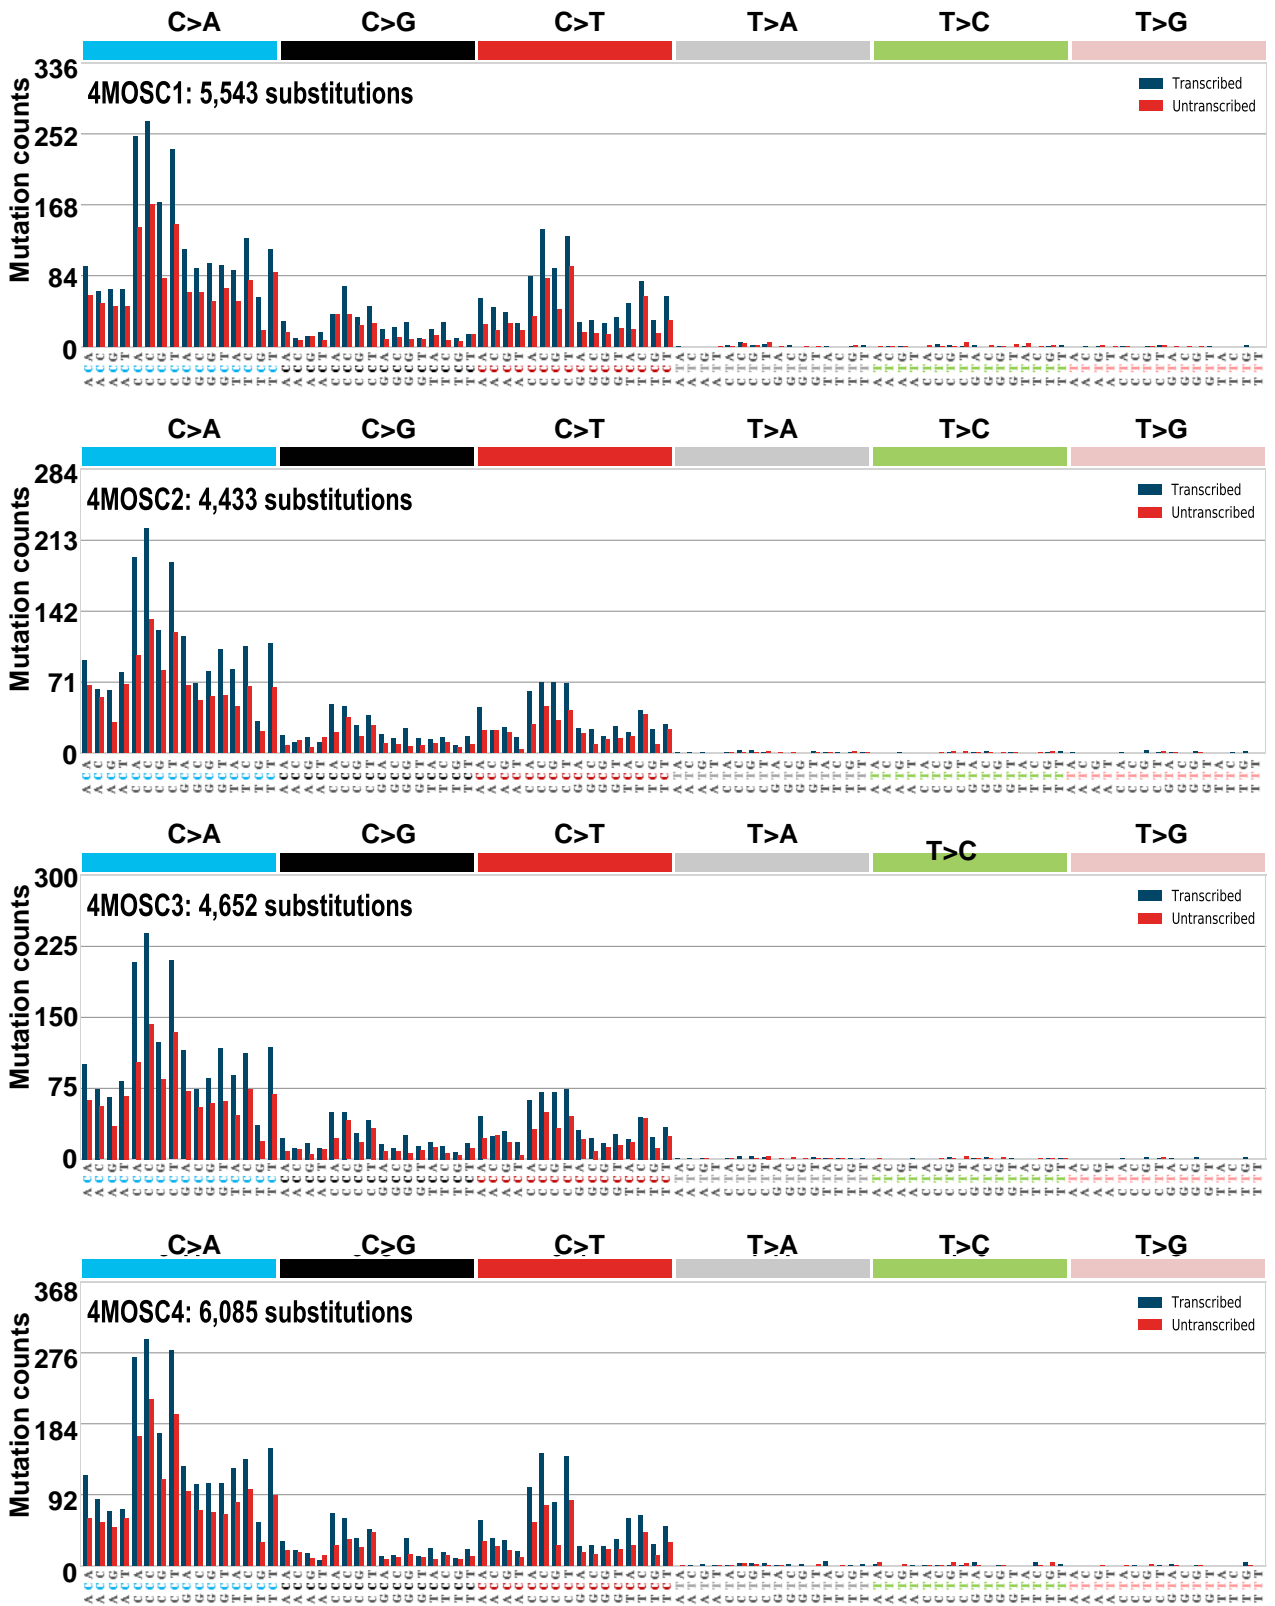

**Supplementary Figure 1. Transcriptional Bias for each individual 4MOSC cell lines.** The somatic mutational profiles of the four 4MOSCs were correlated to (Pearson correlation > 0.93), known mutational signatures in human cancer. The pattern of Signature 4 extracted from cancers associated with tobacco smoking was marked as dark blue columns.

## Supplementary Figure 2

a

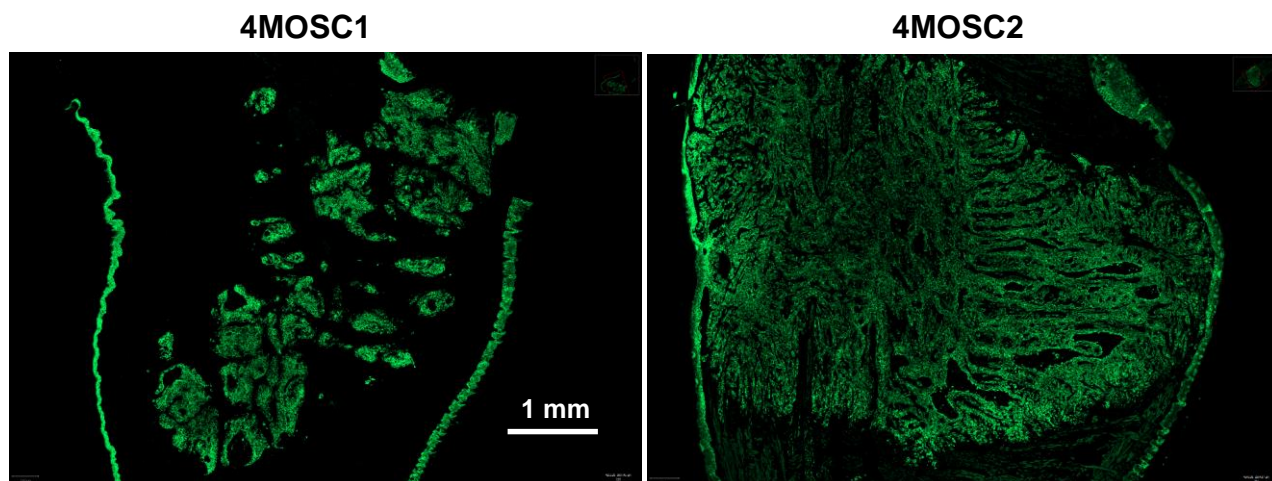

b

2 days post implantation

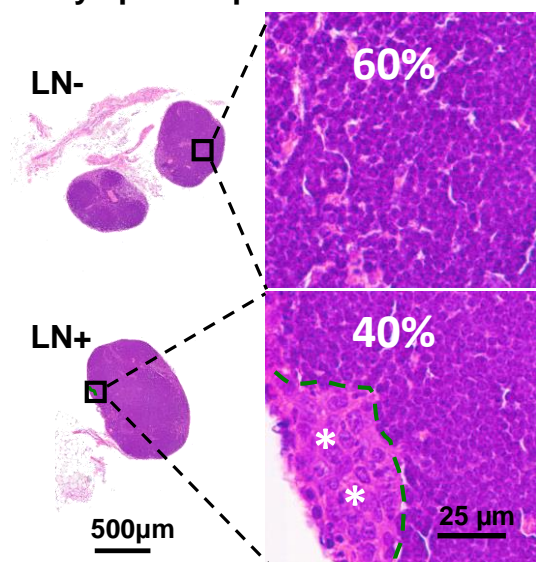

8 days post implantation

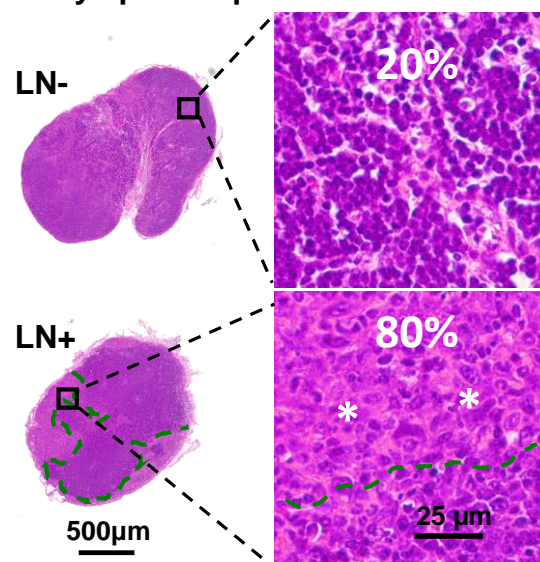

**Supplementary Figure 2. Squamous cell character.** (a) Representative pictures of whole tongue tumors stained to show expression of cytokeratin 5 (CK5, green); left, 4MOSC1; right, 4MOSC2 (n = 3 mice per group). (b) Metastatic growth of 4MOSC2 cells into the lymph node. C57Bl/6 mice were implanted with  $1 \times 10^6$  of 4MOSC2 cells into the tongue. On 2 and 8 days post-implantation, cervical lymph nodes from each mouse were harvested and evaluated by H&E staining. Left, representative H&E stain of a non-metastatic (top) and a metastatic (bottom) cervical lymph node. Right, images at high magnification depict the histologic features of representative area from each individual cervical lymph node. Metastatic area is depicted with a green dotted line, with the tumor cells marked by \* (n = 5 mice per group).

### Supplementary Figure 3

Relative value

Concentration (pg/ml)

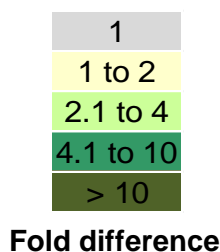

|             | 4MOSC |      | 4MOSC1   |           |     | 4MOSC2 |      |  |
|-------------|-------|------|----------|-----------|-----|--------|------|--|
|             | 1     | 2    |          |           |     |        | Sig. |  |
| CCL11       | 2.9   |      | 292±10   | 100±10    | *** |        |      |  |
| CCL12       | 1.2   |      | 314±63   | 268±30    | ns  |        |      |  |
| CCL17       | 7.1   |      | 361±255  | 51±10     | ns  |        |      |  |
| CCL19       |       | 2.4  | 48.2±6.6 | 118±13    | **  |        |      |  |
| CCL2        | 3.1   |      | 1339±98  | 430±54    | *** |        |      |  |
| CCL20       | 1.7   |      | 1.2±0.2  | 0.7±0.1   | *   |        |      |  |
| CCL21       | 1.7   |      | 1205±114 | 719±41    | **  |        |      |  |
| CCL22       | 4.4   |      | 73.6±6.2 | 16.8±0.9  | *** |        |      |  |
| CCL3        | 1.6   |      | 312±17   | 198±10    | *** |        |      |  |
| CCL4        | 2.9   |      | 295±26   | 102±5     | *** |        |      |  |
| CCL5        | 4.9   |      | 84.8±6.1 | 17.4±2.6  | *** |        |      |  |
| CX3CL1      | 1.4   |      | 132±14   | 96.9±6.3  | ns  |        |      |  |
| CXCL1       |       | 1.7  | 654±110  | 1137±75   | **  |        |      |  |
| CXCL10      |       | 4.0  | 694±82   | 2801±1156 | ns  |        |      |  |
| CXCL2       |       | 1.9  | 4398±835 | 8171±234  | **  |        |      |  |
| CXCL5       |       | 8.5  | 361±21   | 3052±375  | *** |        |      |  |
| EPO         | 1.5   |      | 2.4±0.2  | 1.6±0.1   | **  |        |      |  |
| G-CSF       |       | 13.7 | 355±73   | 4877±68   | *** |        |      |  |
| GM-CSF      |       | 13.6 | 52±14    | 704±51    | *** |        |      |  |
| IFNβ1       |       | 2.5  | 80.6±7.8 | 204±99    | ns  |        |      |  |
| IFNγ        | 1.6   |      | 4.8±1.0  | 3.1±0.4   | ns  |        |      |  |
| IL-10       |       | 1.3  | 2.7±0.4  | 3.6±0.3   | ns  |        |      |  |
| IL-11       | 1.9   |      | 460±138  | 244±51    | ns  |        |      |  |
| IL-12 (p40) | 1.3   |      | 2.8±0.3  | 2.2±0.3   | ns  |        |      |  |
| IL-12 (p70) | 1.2   |      | 4.2±0.8  | 3.6±0.2   | ns  |        |      |  |
| IL-13       | 1.2   |      | 4.7±0.2  | 3.9±0.3   | ns  |        |      |  |
| IL-15       | 1.1   |      | 6.0±0.3  | 5.7±0.4   | ns  |        |      |  |
| IL-16       | 1.5   |      | 795±52   | 543±63    | *   |        |      |  |
| IL-17       | 1.8   |      | 1.8±0.2  | 1.0±0.1   | **  |        |      |  |
| IL-1a       |       | 1.8  | 216±13   | 383±33    | **  |        |      |  |
| IL-1b       |       | 1.3  | 48.6±8.9 | 65.6±5.2  | ns  |        |      |  |
| IL-2        |       |      | 6.5±0.4  | 6.5±0.7   | ns  |        |      |  |
| IL-20       | 1.1   |      | 7.5±0.3  | 7.1±0.3   | ns  |        |      |  |
| IL-3        | 2.8   |      | 4.0±2.2  | 1.4±0.2   | ns  |        |      |  |
| IL-4        | 10.3  |      | 3.1±0.6  | 0.3±0.1   | *** |        |      |  |
| IL-5        | 6.2   |      | 8.1±1.3  | 1.3±0.2   | *** |        |      |  |
| IL-6        | 1.8   |      | 127±32   | 69.7±8.8  | ns  |        |      |  |
| IL-7        |       | 2.1  | 2.6±0.2  | 5.4±0.1   | *** |        |      |  |
| IL9         | 1.2   |      | 11.1±2.4 | 9.4±2.8   | ns  |        |      |  |
| LIF         | 1.6   |      | 88.9±7.2 | 54.9±5.3  | **  |        |      |  |
| M-CSF       | 1.2   |      | 28.2±3.2 | 24.5±3.0  | ns  |        |      |  |
| TIMP-1      | 1.8   |      | 6242±927 | 3510±757  | ns  |        |      |  |
| TNFα        | 1.3   |      | 13.9±1.4 | 10.6±1.1  | ns  |        |      |  |
| VEGF        |       | 26.8 | 1.4±0.2  | 37.5±6.5  | *** |        |      |  |

**Supplementary Figure 3.** Chemokine expression profile of the 4MOSC tumors. C57Bl/6 mice were implanted with  $1 \times 10^6$  of either 4MOSC1 or 4MOSC2 cells into the tongue. Eleven days post-implantation, tongue tumors were dissected and lysed. Tumor lysates were normalized to 1 mg/mL and analyzed to quantify concentrations of multiple chemokines, cytokines, and growth factors. Left, relative values of each chemokine in 4MOSC1 and 4MOSC2; fold differences were calculated by dividing the tumor with the higher concentration by the tumor with the lower concentration, and the tumor with the lower concentration was defined as 1-fold. Right, absolute concentration of each chemokine in 4MOSC1 and 4MOSC2 (n = 5 mice per group; not significant or ns,  $p > 0.05$ ; \*,  $p < 0.05$ ; \*\*,  $p < 0.01$ ; and \*\*\*,  $p < 0.001$  when comparing 4MOSC1 with 4MOSC2 with two sided Student's *t*-test; data are represented as mean± SEM).

## Supplementary Figure 4

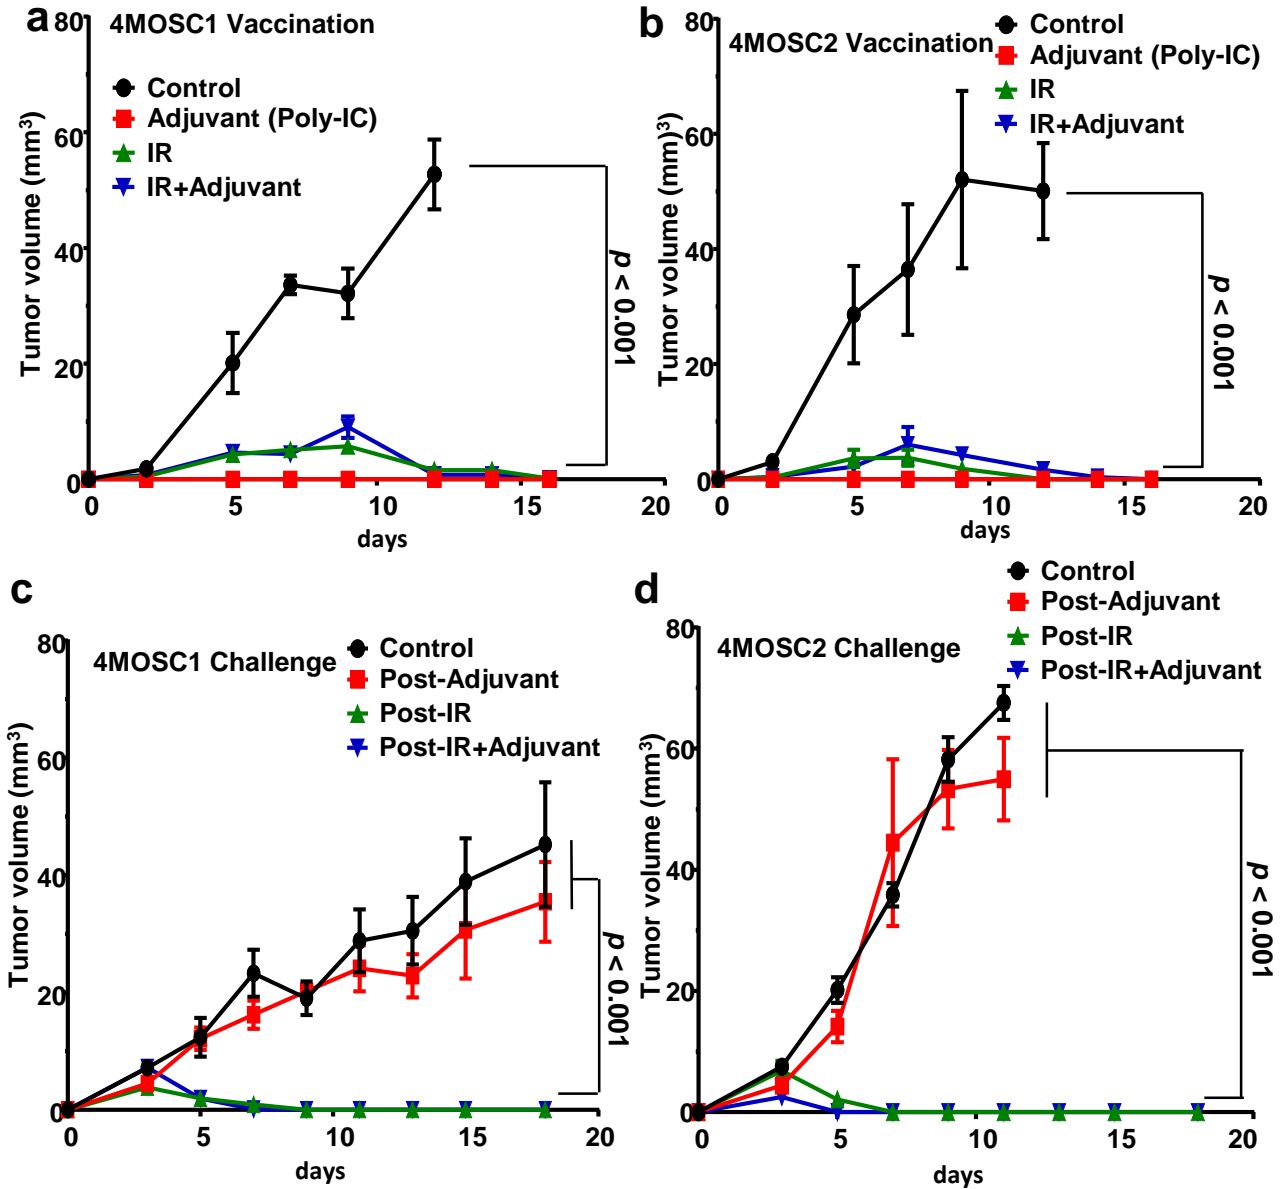

**Supplementary Figure 4. Immunogenicity of 4MOSCs.** (a-b) Memory immune responses induced by vaccination with irradiated 4MOSC cells. 4MOSC1 or 4MOSC2 cells were irradiated with 45 Gy and  $1 \times 10^6$  cells were injected into the tongue of C57Bl/6 mice, with (green) or without (blue) polyinosinic-polycytidylic acid (poly IC). Mice injected with non-irradiated 4MOSC cells (black) or mice only treated by poly IC (red) were used as controls. The average tumor volume of each group is shown ( $n = 5$  mice per group, the tumor growth curves were compared by the longitudinal data analysis method; data are represented as mean  $\pm$  SEM). (c-d) Vaccinated mice (green and blue) were re-challenged with  $1 \times 10^6$  live 4MOSC cells 6 weeks after. Naïve mice (black) and mice post poly IC treatment (red) were used as controls. The average tumor volume of each group is shown ( $n = 5$  mice per group, the tumor growth curves were compared by the longitudinal data analysis method; data are represented as mean  $\pm$  SEM).

## Supplementary Figure 5

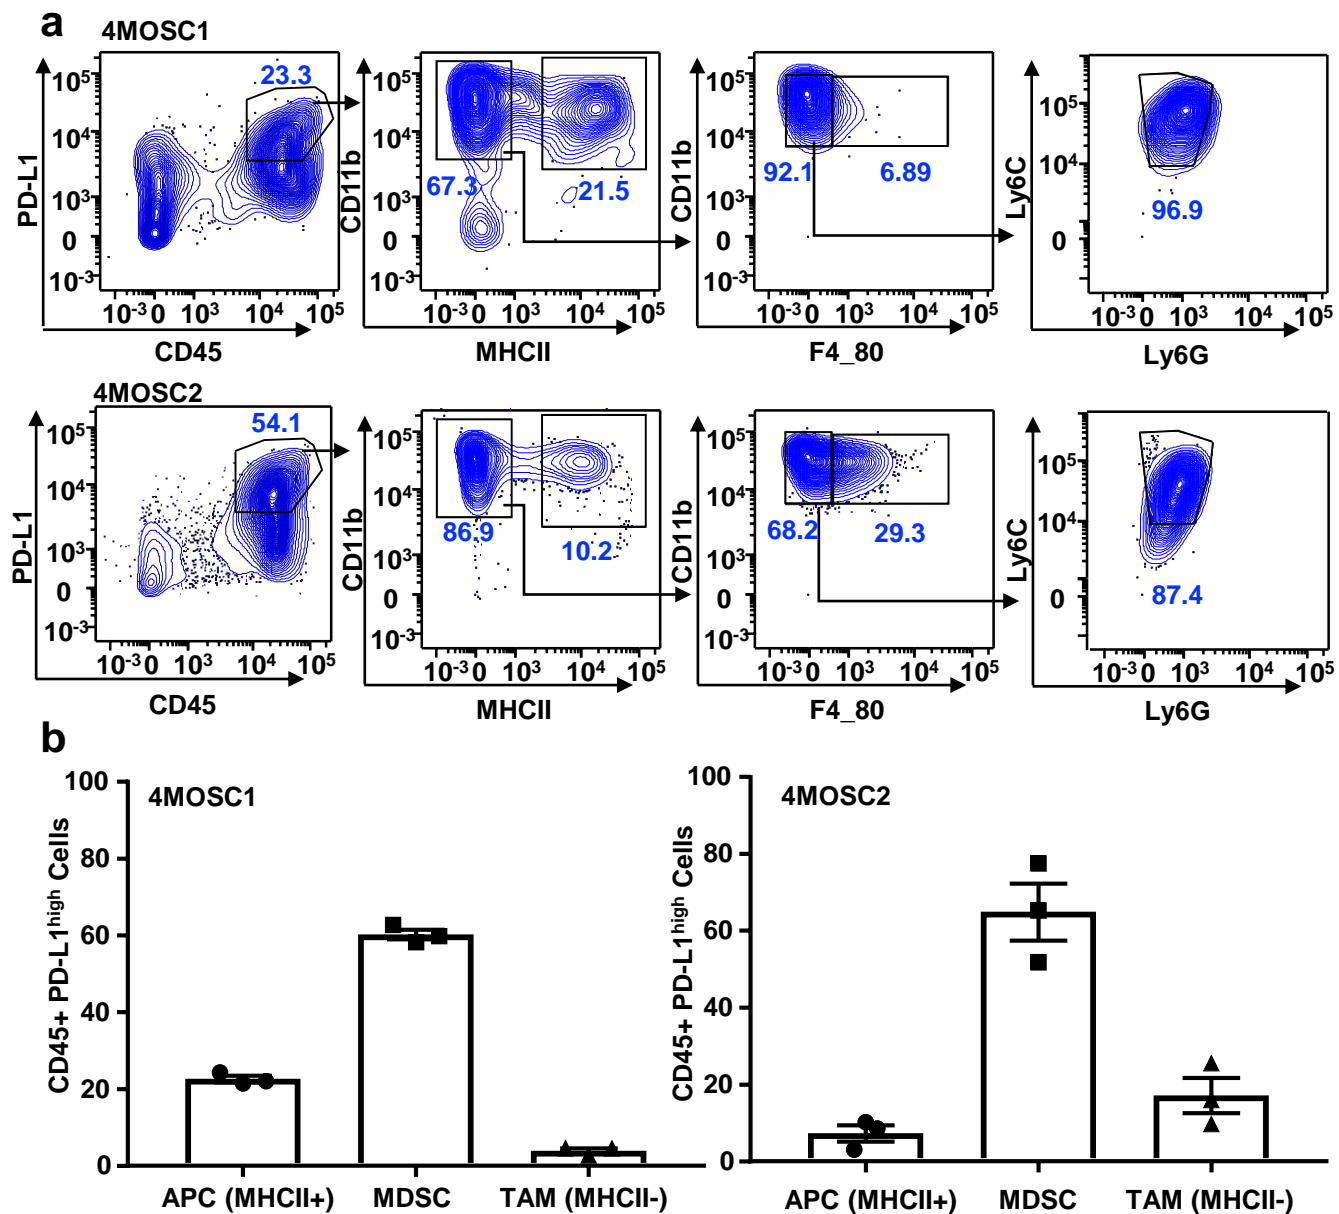

**Supplementary Figure 5. PD-L1 is expressed on tumor and tumor-infiltrating myeloid immune cells.** Frequency of live 4MOSC1 or 4MOSC2 tumors expressing PD-L1. **(a)** Shown are representative flow cytometry plots of PD-L1 expression on 4MOSC cells, CD45<sup>+</sup> immune cells, MHCII<sup>+</sup> antigen presenting cells (APC), F4/80<sup>+</sup> MHCII<sup>-</sup> tumor-associated macrophages (TAMs), and Ly6C<sup>+</sup>Ly6G<sup>+</sup> MDSCs. **(b)** The averaged frequency of each immune cell population expressing PD-L1<sup>high</sup> in 4MOSC1 and 4MOSC2 is shown (n = 3 mice per group; data are represented as mean ± SEM).

## Supplementary Figure 6

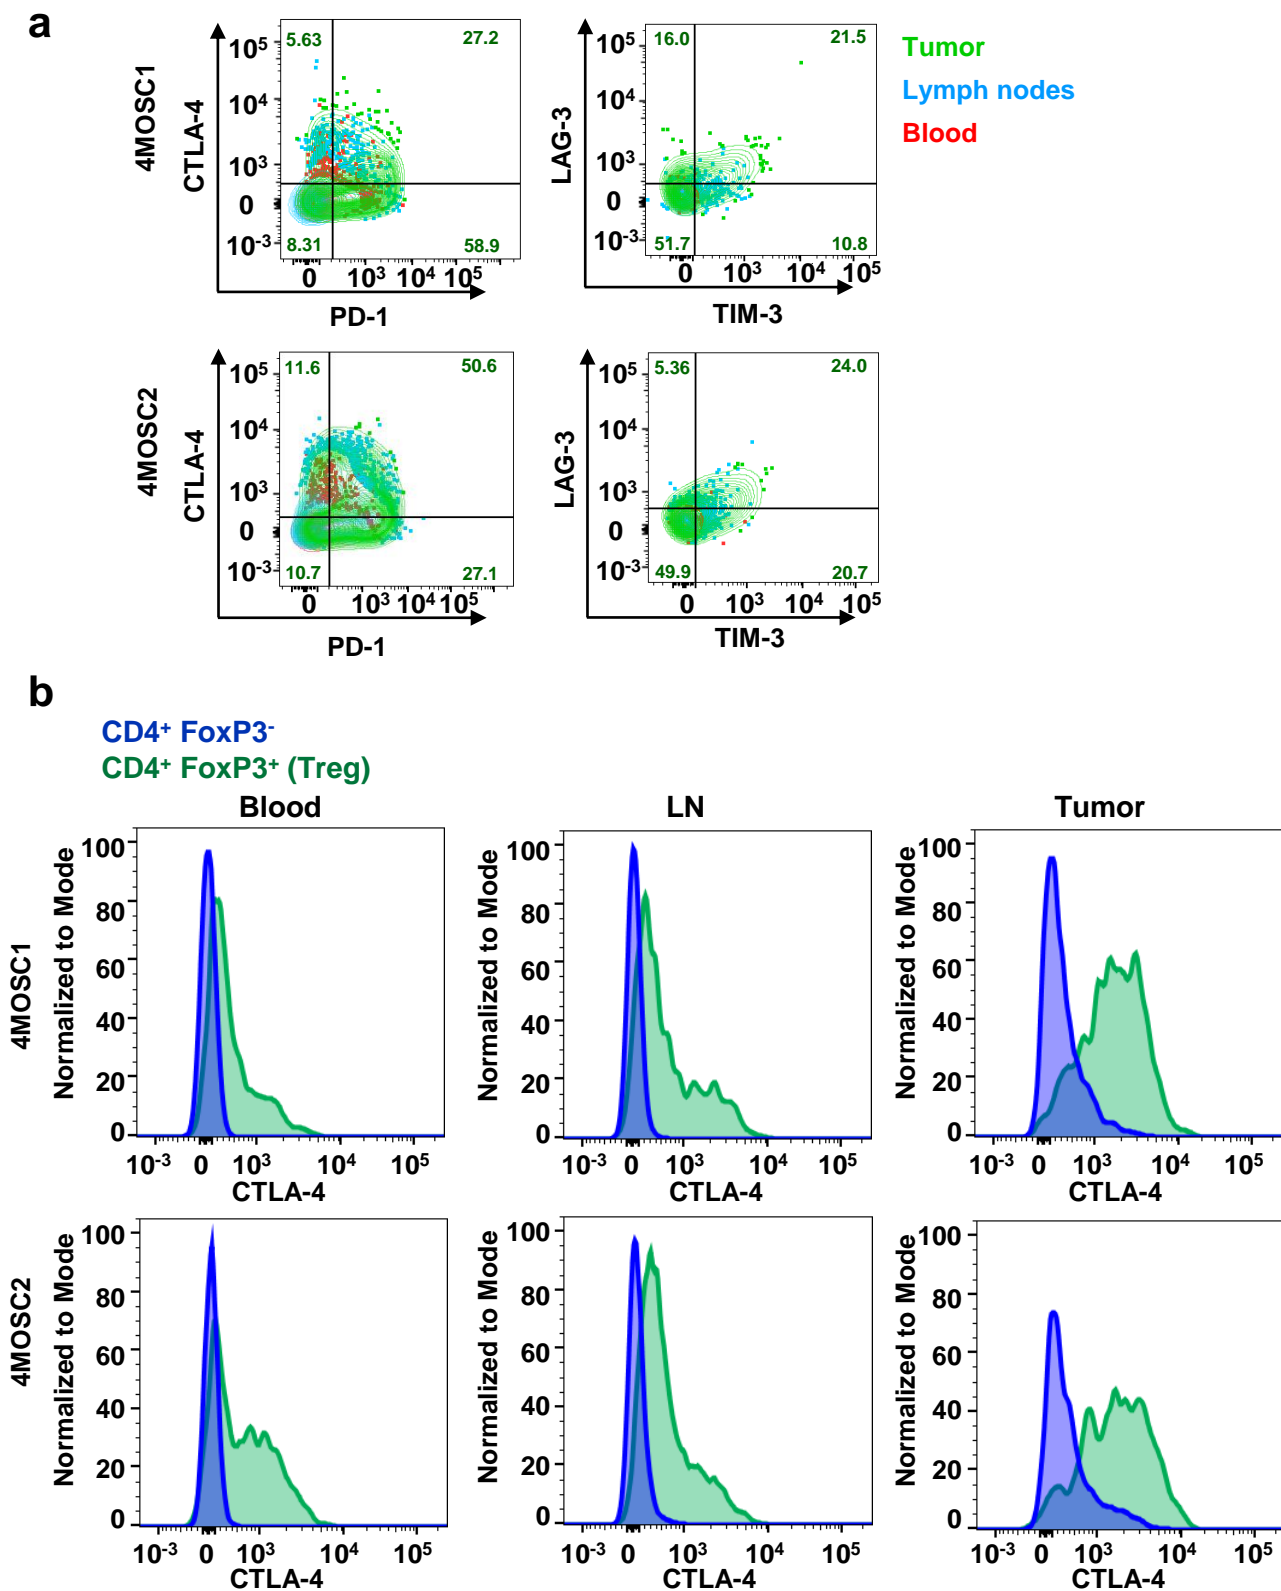

**Supplementary Figure 6. Characterization of inhibitory receptor expression on tumor-infiltrating CD4 T cells in 4MOSCs.** Frequency of live 4MOSC1 or 4MOSC2 tumors expressing inhibitory receptors. (a) Shown are representative flow cytometry plots of the frequency of CD4<sup>+</sup> cells expressing inhibitory receptors PD-1, CTLA-4, LAG-3 and TIM-3 (n = 4 mice per group). Contour plots of lymphocytes from tumor (green), and corresponding cervical lymph nodes (blue), and blood (red) are overlaid and the frequencies of tumor CD4<sup>+</sup> T cells expressing each inhibitory receptor are shown. (b) The expression of CTLA-4 on CD4 T cells, Tregs (CD4<sup>+</sup>FoxP3<sup>+</sup>) or non-Tregs (CD4<sup>+</sup>FoxP3<sup>-</sup>) are represented by overlaid histograms in blood, LN, and tumor (n = 4 mice per group).

## Supplementary Figure 7

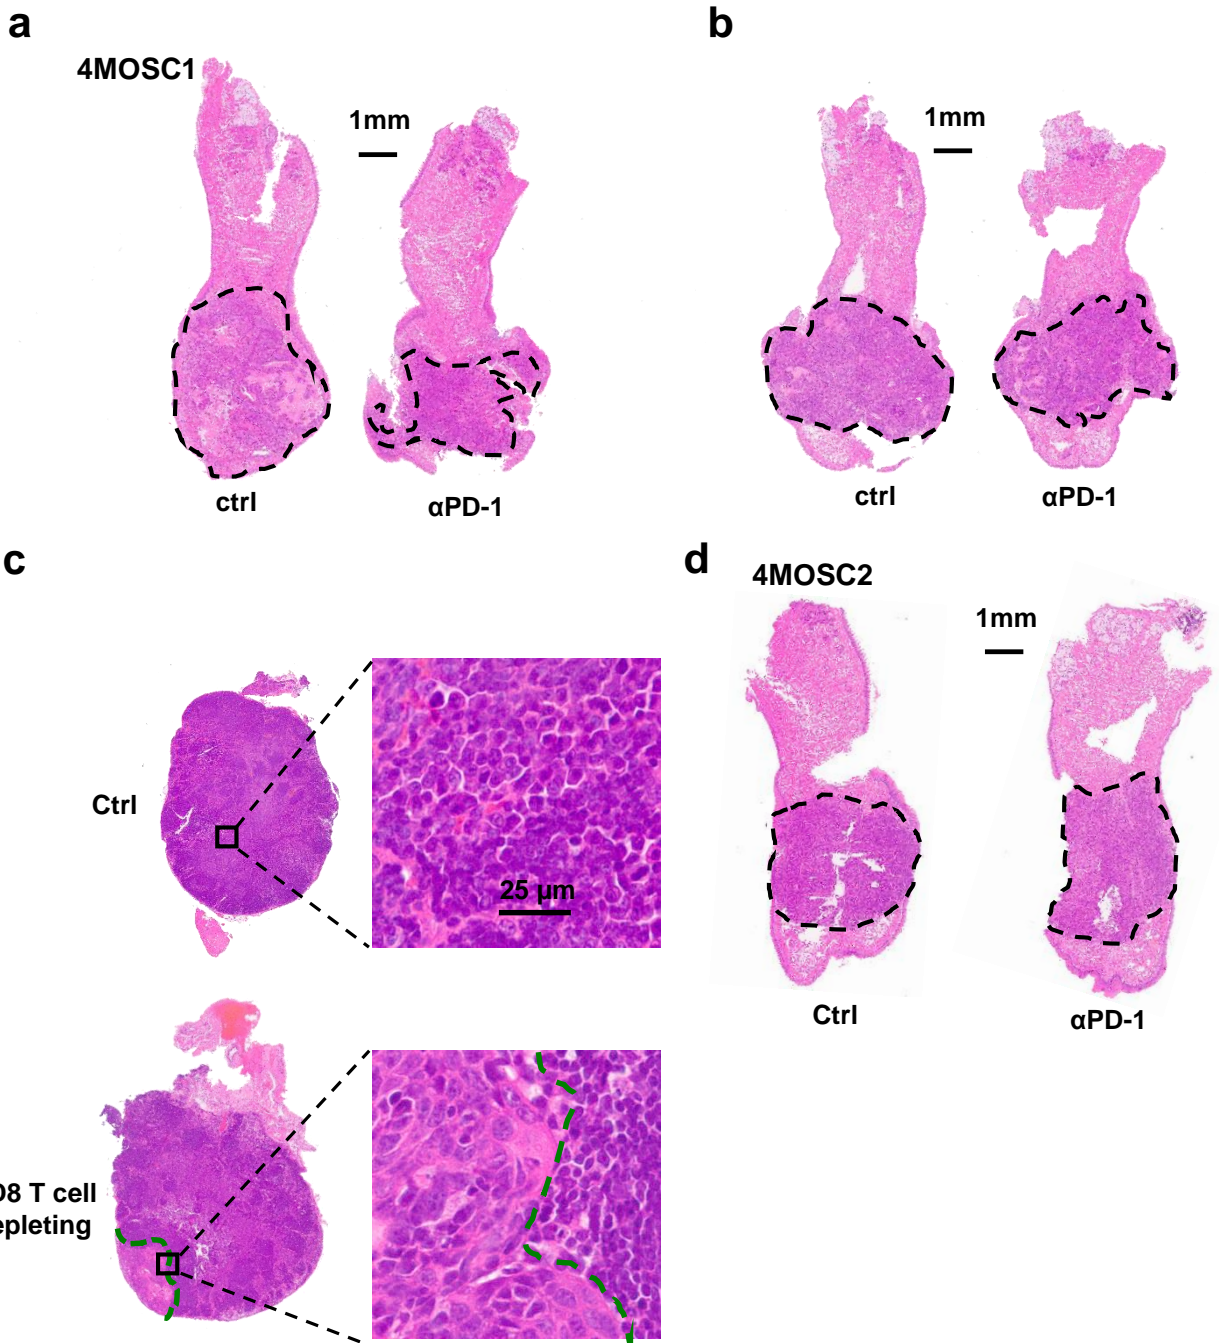

**Supplementary Figure 7. Histopathological analysis of tongues and cervical lymph nodes from 4MOSC1 or 4MOSC2 tumor-bearing mice.** (a-b) Representative H&E stains of mouse tumors from the experiment in panel 3a (n = 10 mice per group) and 3e (n = 5 mice per group). The H&E stained tissue section of an HNSCC tumor is depicted with a dotted line. (c) Top panel, representative H&E stain of a non-metastatic cervical lymph node from mice with 4MOSC1 tumors. Bottom panel, representative H&E stain of a metastatic cervical lymph node from mice with 4MOSC1 tumors after treatment with CD8 T cell-depleting antibody. Metastatic growth of 4MOSC1 cells into the lymph node is depicted with a dotted line in the left area. ((n = 5 mice per group)) (d) Representative H&E stains of mouse tumors from the experiment in panel 3g. The H&E stained tissue section of an HNSCC tumor is depicted with a dotted line (n = 5 mice per group).



## Supplementary Figure 8

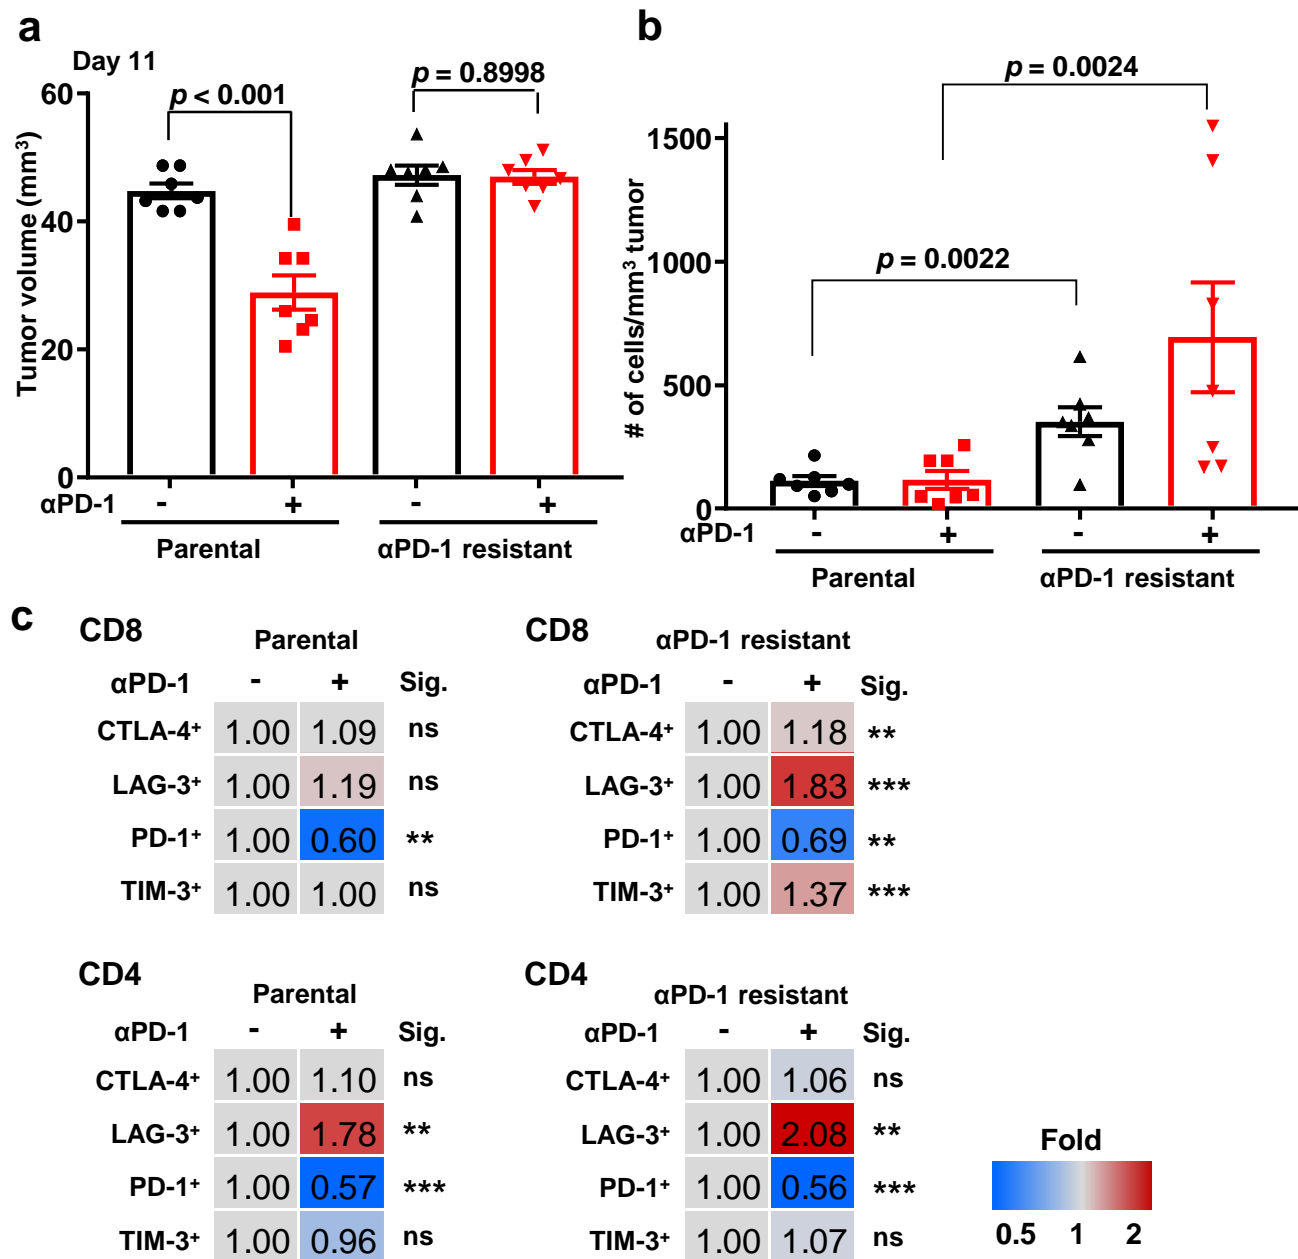

**Supplementary Figure 8. Difference of immune infiltration and immune checkpoints in parental 4MOSC1 and αPD-1-resistant 4MOSC1.** Anti-PD-1-resistant 4MOSC1 cell lines were established by first isolating cells from anti-PD-1-treated mice showing no response and re-injecting into C57Bl/6 mice. This process was repeated for a total of 3 rounds to generate the resistant cell line. C57Bl/6 mice were implanted with  $1 \times 10^6$  parental or anti-PD1-resistant 4MOSC1 cells. After the tumors reached  $\sim 30$  mm<sup>3</sup>, mice were treated IP with 10mg/kg of isotype control or 10mg/kg of anti-PD-1 every other day for 3 treatments total. **(a)** Shown is the average volume of each tumor at the endpoint of the experiment with error bars representing standard error ( $n = 7$  mice per group; two sided Student's *t*-test; data are represented as mean  $\pm$  SEM). **(b)** Quantification of tumor-infiltrating PMN-MDSCs (Ly6G<sup>hi</sup>) was performed by flow cytometry ( $n = 7$  mice per group; two sided Student's *t*-test; data are represented as mean  $\pm$  SEM). **(c)** Shown is the average fold change of the frequency of tumor-infiltrating CD4 and CD8 T cells expressing inhibitory receptors from anti-PD-1-treated parental and resistant 4MOSC1 ( $n = 7$  mice per group; not significant or ns,  $p > 0.05$ ; \*,  $p < 0.05$ ; and \*\*\*,  $p < 0.001$ , two sided Student's *t*-test).

## Supplementary Figure 9

**a**

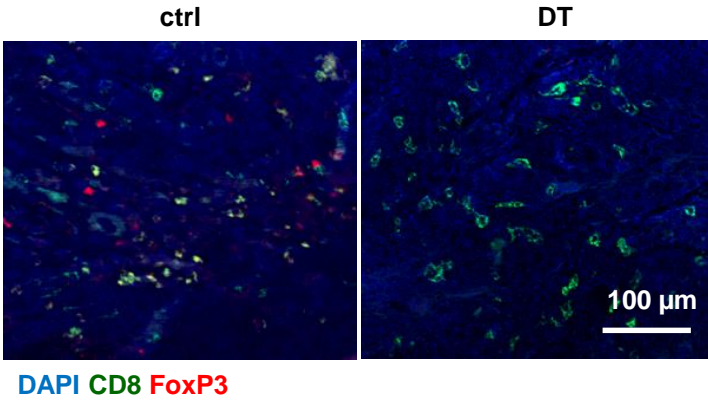

**b**

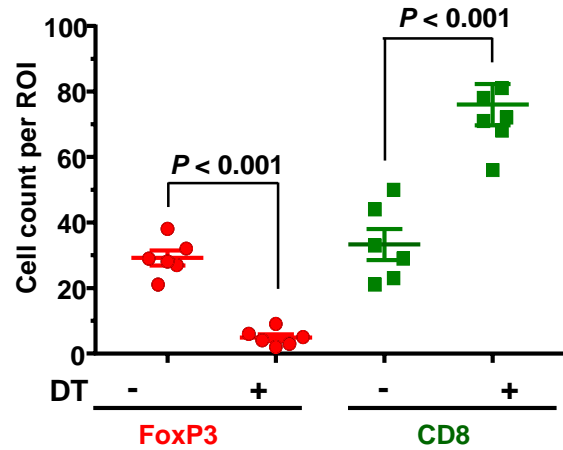

**c**

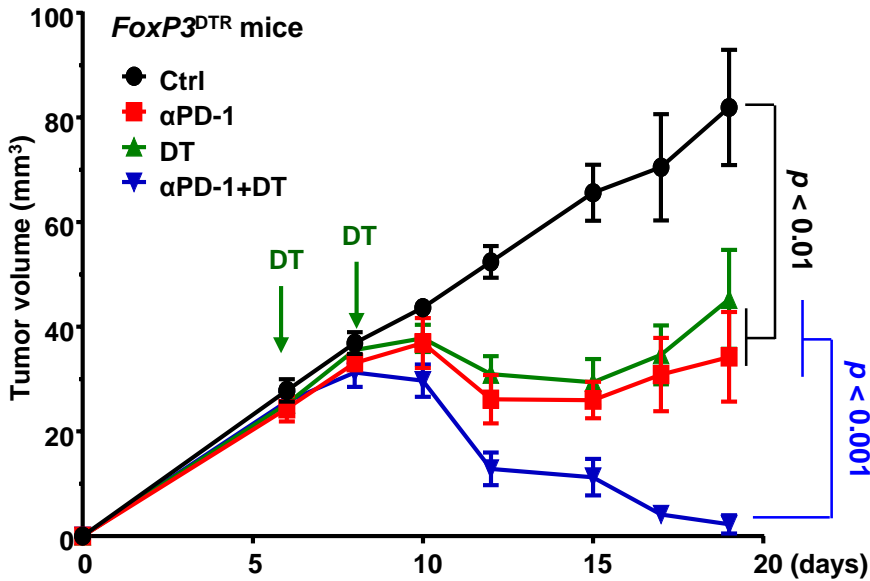

**Supplementary Figure 9. Treg-mediated suppression of anti-PD-1 activity in 4MOSC1 tumors in *FoxP3<sup>DTR</sup>* mice.** (a) *FoxP3<sup>DTR</sup>* mice were implanted with  $1 \times 10^6$  of 4MOSC1 cells into the tongue, and when they reached approximately  $30 \text{ mm}^3$ , mice were treated IP with PBS or diphtheria toxin (DT). Immunofluorescent staining of isolated tumors with FoxP3 and CD8 confirm transient elimination of Tregs with DT and increase in CD8 T cells. (b) Shown is the quantification of the FoxP3 and CD8 positive cells by 3 regions of interests (ROI) per mouse, quantified by Qupath software for mice untreated and treated with DT. ( $n = 6$  mice per group; two sided Student's *t*-test; data are represented as mean  $\pm$  SEM). (c) *FoxP3<sup>DTR</sup>* mice with 4MOSC1 tongue tumors were treated IP with 10mg/kg of isotype control (black), 10mg/kg of anti-PD-1 (red), diphtheria toxin (green) or both (blue). ( $n = 5$  mice per group; the tumor growth curves were compared by the longitudinal data analysis method; data are represented as mean  $\pm$  SEM).

## Supplementary Figure 10

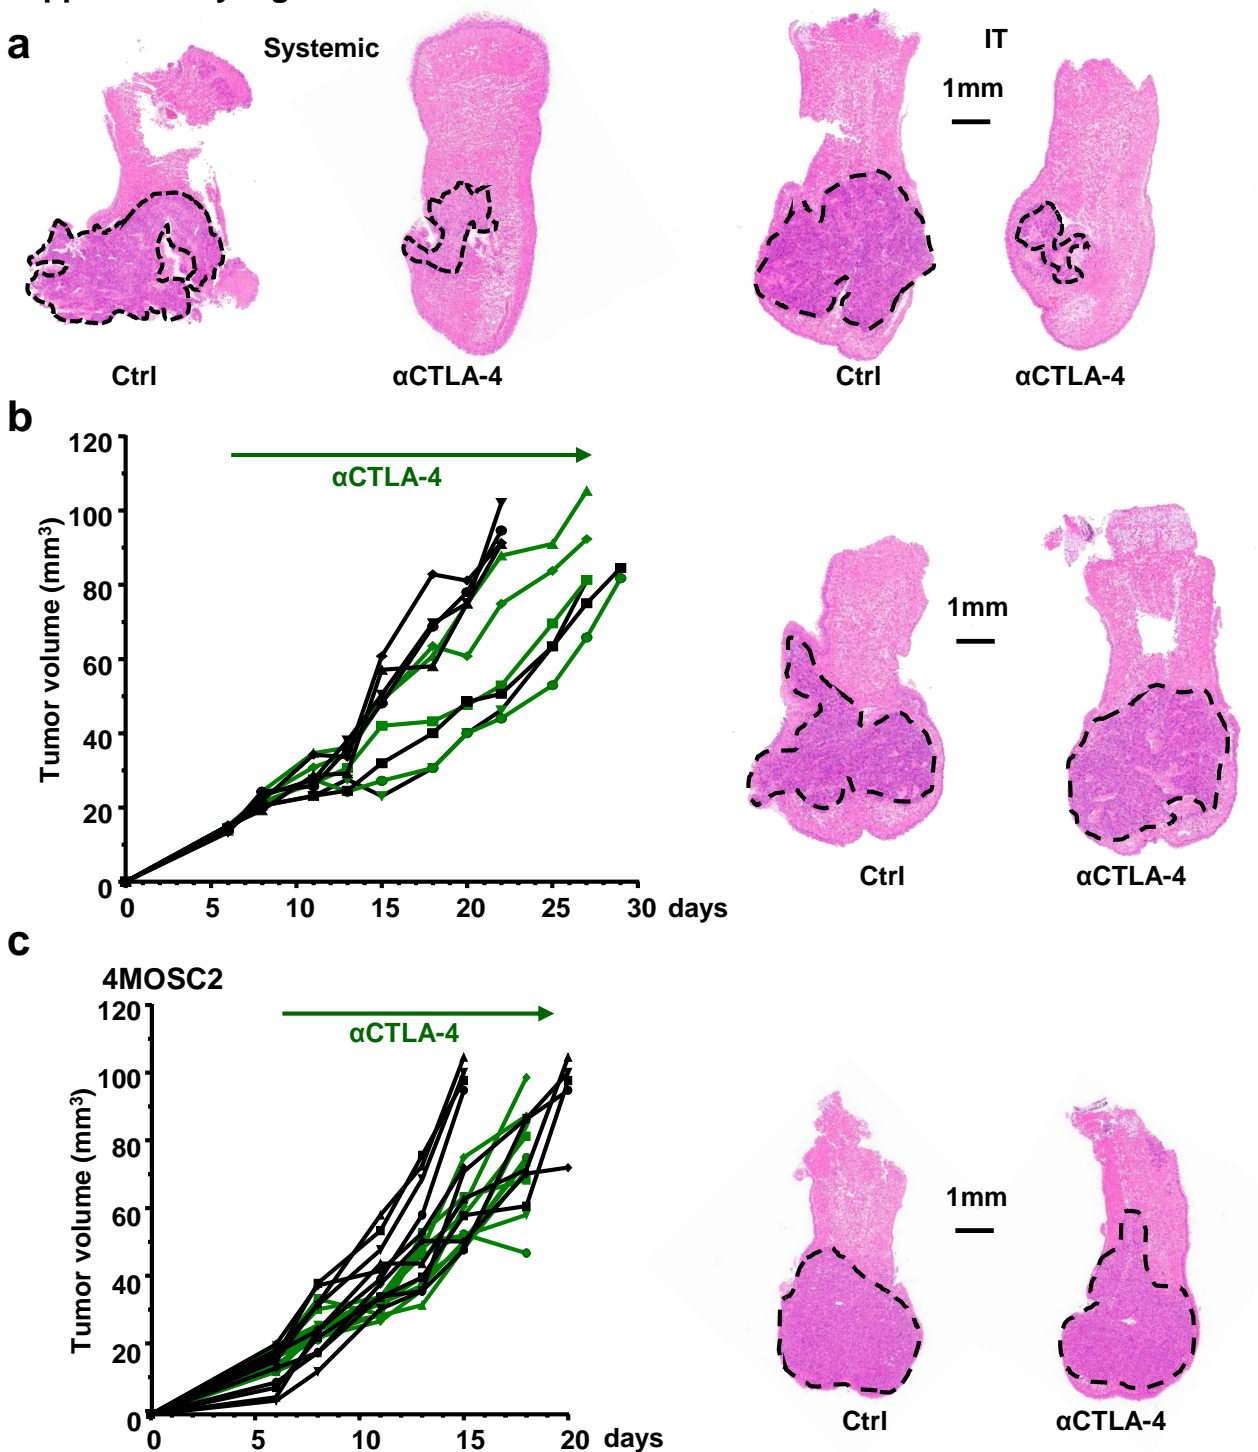

**Supplementary Figure 10. Histological analysis of tongues from 4MOSC1 or 4MOSC2 tumor-bearing mice treated with anti-CTLA-4.** (a) Representative H&E stains of mouse tumors from the experiment in panel 4a. The H&E stained tissue section of an HNSCC tumor is depicted with a dotted line ( $n = 10$  mice per group). (b) Left panel, anti-CTLA-4 dependency on CD8 T cells. C57Bl/6 mice were treated with a CD8 T cell-depletion antibody, and transplanted with  $1 \times 10^6$  4MOSC1 cells into the tongue. After the tumors reached  $\sim 30 \text{ mm}^3$ , mice were treated IT with 5 mg/kg of isotype control (black) or anti-CTLA-4 (green) ( $n = 5$  per group). Individual growth curves of 4MOSC1 tumor-bearing mice plotting primary tumor growth were recorded. Right panel, representative H&E of mouse tumors from the experiment in left panel. The H&E stained tissue section of an HNSCC tumor is depicted with a dotted line. (c) Left panel, antitumor efficacy of anti-CTLA-4 for mice with 4MOSC2 tumors. C57Bl/6 mice were transplanted with  $1 \times 10^6$  4MOSC2 cells into the tongue. After the tumors reached  $\sim 30 \text{ mm}^3$ , mice were treated IT with 5 mg/kg of isotype control (black) or anti-CTLA-4 (green) ( $n = 10$  mice per group). Individual growth curves of 4MOSC2 tumor-bearing mice plotting primary tumor growth were recorded. Right panel, representative H&E of mouse tumors from the experiment in left panel. The H&E stained tissue section of an HNSCC tumor is depicted with a dotted line.

## Supplementary Figure 11

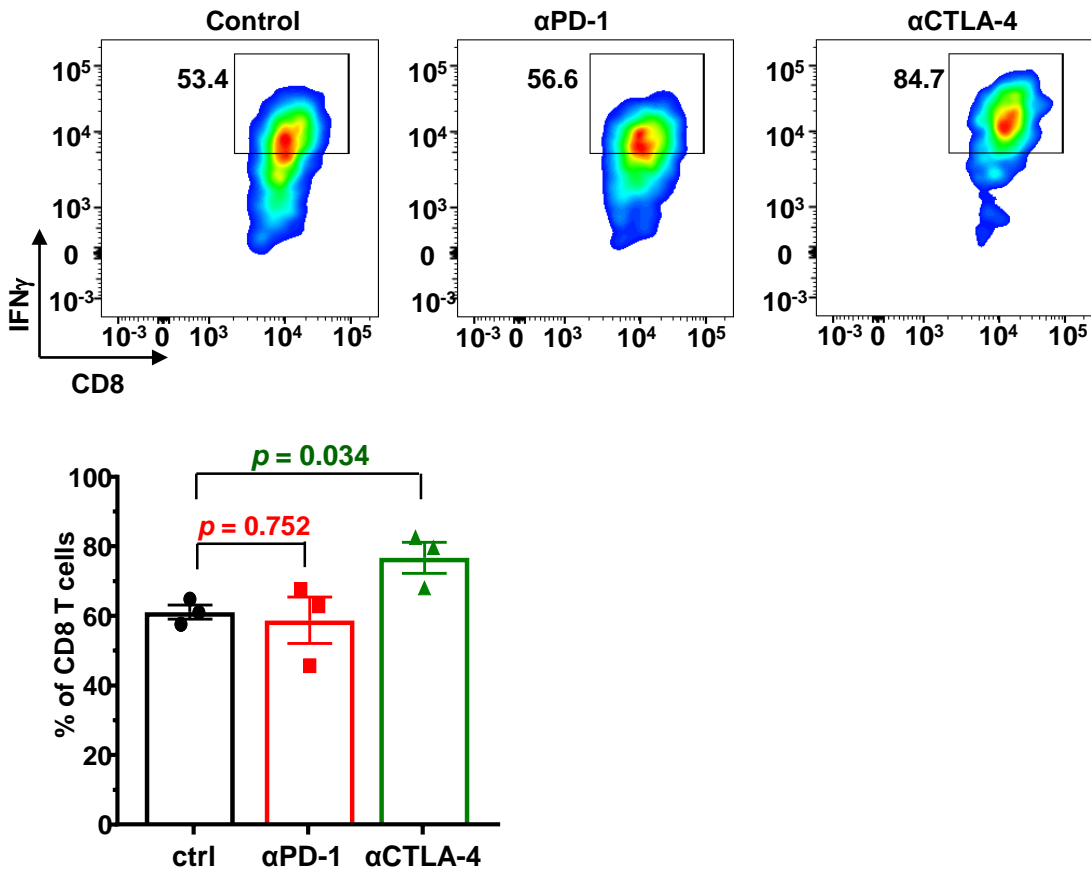

**Supplementary Figure 11. Increased expression of IFN $\gamma$  in CD8 T cells by anti-CTLA-4 treatment.** Frequency of CD45 $^+$ , Thy1.2 $^+$ , CD8 $^+$  expressing IFN $\gamma$ . Top panel, a representative flow cytometry plot from one mouse showing the frequency of IFN $\gamma^+$  out of CD8 $^+$  cells is shown. Bottom panel, the frequency of IFN $\gamma^+$ CD8 $^+$  cells was quantified following treatment with anti-PD-1 or anti-CTLA-4 ( $n = 3$  mice per group; two sided Student's  $t$ -test; data are represented as mean  $\pm$  SEM).

## Supplementary Figure 12

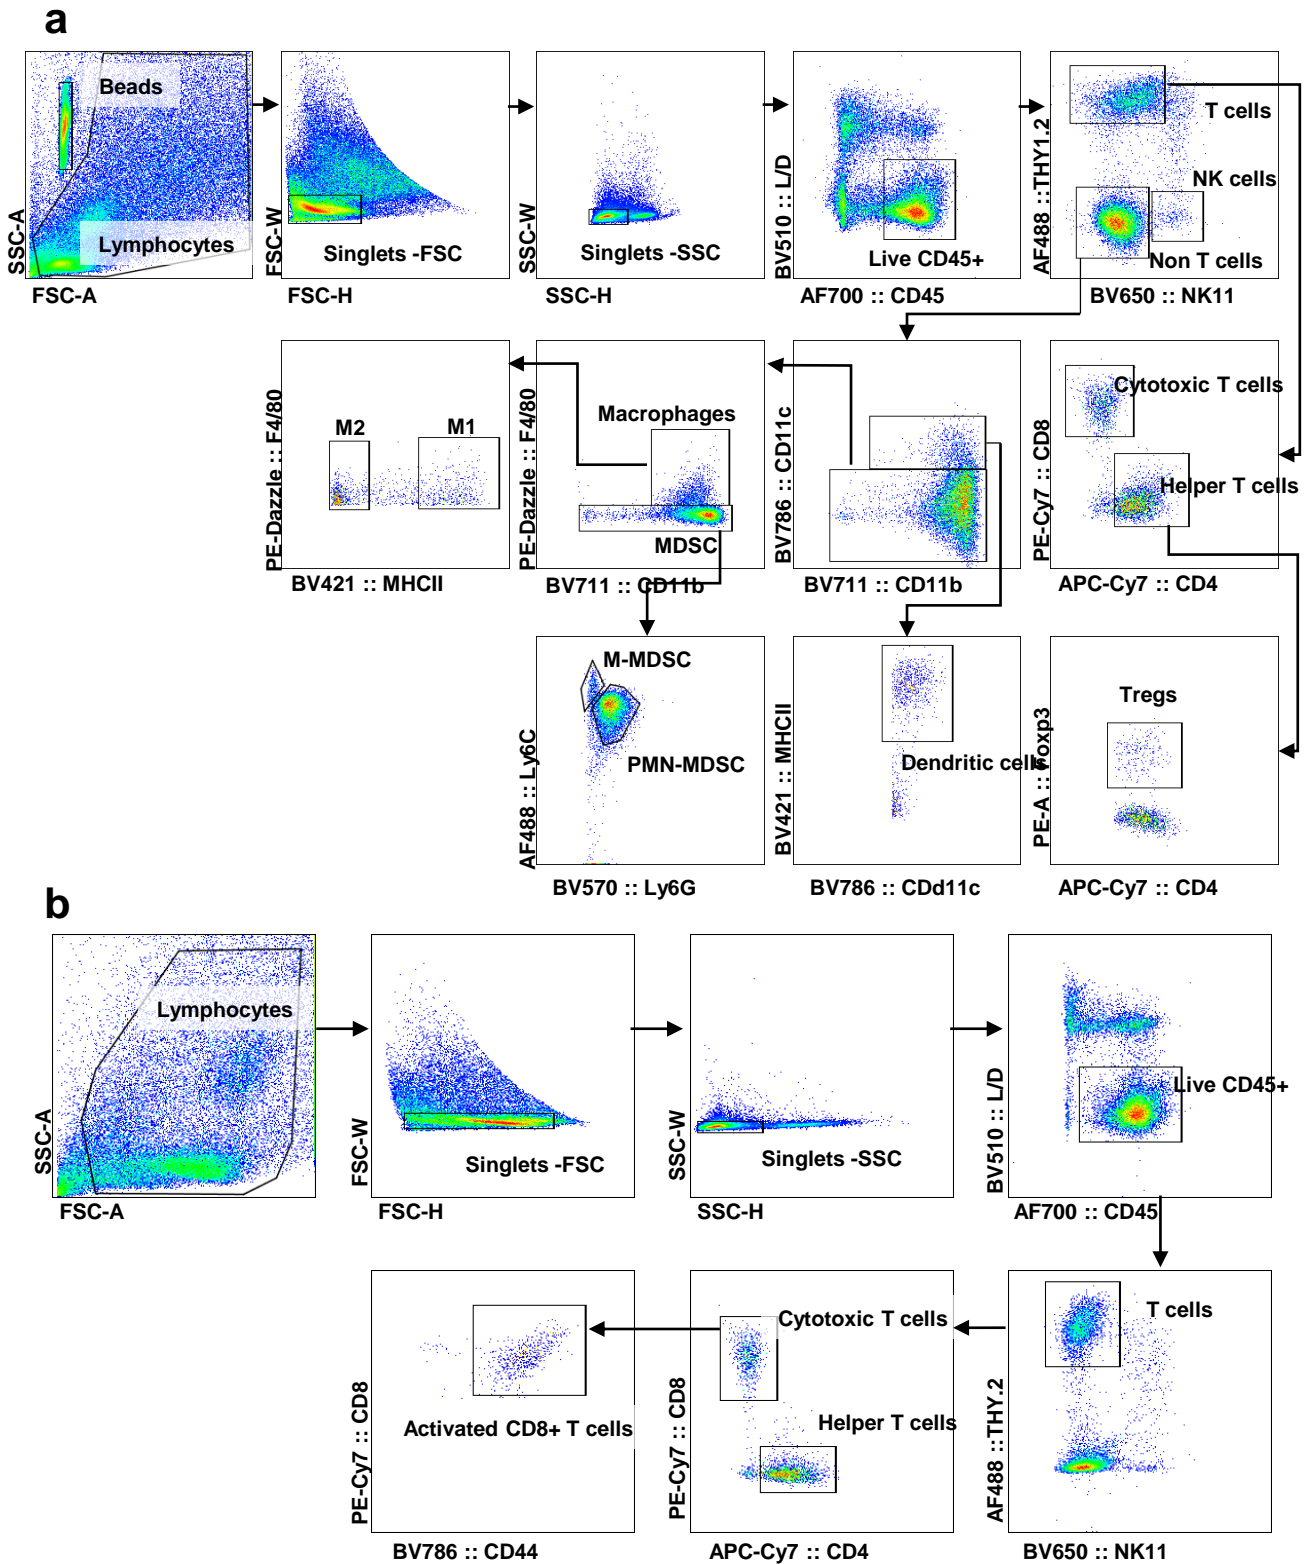

**Supplementary Figure 12. Representative flow cytometry gating strategies.** Representative flow cytometry plots to gate (a) tumor-infiltrating immune cells used to quantify immune cells in Figure 2f, 3c, 4d, 4e, Supplementary Figures 8a, 8b, and 11, and (b) T cell inhibitory receptors used to characterize T cells used in Figures 2g, Supplementary Figures 6a, 6b, and 8c are shown. Gating for PD-1, TIM-3, LAG-3, and CTLA-4 on activated CD8 T cells (CD45<sup>+</sup>THY1.2<sup>+</sup>CD8<sup>+</sup>CD44<sup>+</sup>) was determined by fluorescence minus one controls.
